# Supplementary material for: Quality of Systematic Reviews of the Foods with Function Claims in Japan: Comparative Before- and After-Evaluation of Verification Reports by the Consumer Affairs Agency
Source: Nutrients. 2019 Jul 12;11(7):1583. doi: 10.3390/nu11071583 (PMC6682984; doi:10.3390/nu11071583)
Supplement: Supplementary file 1 [file nutrients-11-01583-s001.xls]

## Sheet: Sheet1
Table S1: Results of quality assessment of all targeted systematic reviews
	Each item was scored as ‘present’ (Yes), ‘absent’ (No), ‘unclear or inadequately described’ (Can’t answer), or ‘Not applicable’ (n/a). Depending on the study design (with or without meta-analysis), some items were not applicable; therefore, the “n/a” score was not considered to be an error in the calculation for quality assessment.
	#1	#2	#3a		#3b	#4	#5	#6	#7	#8	#9	#10	#11	Evaluation score
Randomized No.*	Was an 'a priori' design provided?	Was there duplicate study selection and data extraction?	Was a comprehensive literature search performed?	Databases (N)	Did the SR use the MESH terms and related search function to detect comprehensi -vely?	Was the status of publication used as an inclusion criterion?	A list of included and excluded studies should be provided.	Were the characteristics of the included studies provided?	Was the scientific quality of the included studies assessed and documented?	Was the scientific quality of the included studies used appropriately in formulating conclusions?	Were the methods used to combine the findings of studies appropriate?	Was the likelihood of publication bias assessed?	Was the conflict of interest stated?	pts./11
1	Y	C	Ichushi-Web JDream III PubMed CENTRAL The Cochrane Library	5	N	N	Y	Y	C	C	NA	N	C	3
2	Y	C	JDream III PubMed	2	Y	C	Y	Y	C	C	NA	N	Y	5
3	Y	C	JDream III PubMed	2	Y	C	Y	Y	C	C	NA	N	Y	5
4	Y	Y	Ichushi-Web PubMed CENTRAL	3	N	N	Y	Y	C	C	NA	N	C	4
5	Y	C	JDream III PubMed MEDLINE	3	C	C	Y	Y	C	C	NA	N	C	3
6	Y	C	Ichushi-Web JDream III PubMed CENTRAL	4	Y	C	Y	Y	C	C	NA	N	Y	5
7	Y	Y	Ichushi-Web PubMed CENTRAL Cinii	4	N	C	Y	Y	Y	Y	Y	Y	C	8
8	Y	Y	Ichushi-Web JDream III PubMed UMIN-CTR	4	Y	C	Y	Y	Y	C	NA	N	Y	7
9	Y	Y	Ichushi-Web PubMed CENTRAL	3	N	N	Y	Y	C	C	NA	N	C	4
10	Y	Y	Ichushi-Web JDream III PubMed CENTRAL SCOPUS UMIN-CTR	6	Y	C	Y	Y	Y	Y	NA	N	C	7
11	Y	Y	Ichushi-Web PubMed CENTRAL Cinii	4	N	C	Y	Y	Y	Y	Y	Y	C	8
12	Y	Y	Ichushi-Web PubMed CENTRAL Cinii MEDLINE EMBASE	6	N	C	Y	Y	Y	Y	Y	Y	Y	9
13	Y	Y	JDream III PubMed UMIN-CTR	3	Y	Y	Y	Y	Y	C	NA	C	C	7
14	Y	Y	Ichushi-Web JDream III PubMed CENTRAL	4	Y	N	Y	Y	Y	C	NA	N	Y	7
15	Y	Y	Ichushi-Web JDream III PubMed	3	N	C	Y	Y	Y	C	NA	C	Y	6
16	Y	Y	Ichushi-Web JDream III PubMed J-GLOBAL	4	C	C	Y	Y	Y	C	NA	Y	C	6
17	Y	N	Ichushi-Web JDream III PubMed CENTRAL	4	Y	C	Y	Y	Y	C	NA	N	Y	6
18	Y	Y	JDream III PubMed CENTRAL J-Stage UMIN-CTR	5	C	N	Y	Y	Y	Y	NA	N	N	6
19	Y	Y	JDream III PubMed CENTRAL UMIN-CTR	4	N	C	Y	Y	Y	Y	NA	C	N	6
20	Y	C	JDream III PubMed CENTRAL	3	N	C	Y	Y	Y	C	NA	N	C	4
21	Y	C	Ichushi-Web JDream III PubMed	3	N	N	Y	Y	Y	N	NA	N	Y	5
22	Y	C	Ichushi-Web PubMed	2	N	N	Y	Y	Y	N	NA	N	C	4
23	Y	N	PubMed J-Stage UMIN-CTR	3	N	C	Y	Y	C	N	NA	C	N	3
24	Y	Y	Ichushi-Web PubMed CENTRAL Cinii	4	N	C	Y	Y	Y	Y	Y	Y	C	8
25	Y	Y	Ichushi-Web JDream III PubMed EMBASE MEDLINE	5	N	N	Y	Y	Y	C	NA	N	N	5
26	Y	Y	Ichushi-Web PubMed Natural Medicines Comprehensive Database	3	C	Y	Y	Y	Y	C	NA	C	Y	7
27	Y	N	Ichushi-Web PubMed CENTRAL	3	Y	N	Y	Y	Y	C	NA	N	Y	6
28	N	N	Ichushi-Web JDream III PubMed CENTRAL	4	N	N	Y	Y	C	C	NA	C	N	2
29	Y	Y	Ichushi-Web JDream III PubMed CENTRAL CINAHL Reaxys Global Health Library Web of Science SciFinder Western Pacific Region Index Medicus Cochrane Methodology Register Health Technology Assessments Database NHS Economic Evaluation Database International Clinical Trials Registry Platform (ICTRP) International Prospective Register of Systematic Review (PROSPERO) ClinicalTrials.gov UMIN-CTR	17	Y	Y	Y	Y	Y	Y	Y	Y	Y	11
30	Y	N	Ichushi-Web PubMed	2	N	N	Y	Y	Y	C	NA	N	N	4
31	Y	N	Ichushi-Web PubMed CENTRAL	3	N	N	Y	Y	Y	C	NA	N	C	4
32	Y	N	Ichushi-Web PubMed CENTRAL J-Stage	4	N	N	Y	Y	Y	C	Y	Y	Y	7
33	Y	Y	Ichushi-Web PubMed	2	N	N	Y	Y	Y	N	NA	N	Y	6
34	C	N	Ichushi-Web PubMed CENTRAL J-Stage	4	N	N	Y	Y	Y	C	Y	Y	Y	6
35	Y	Y	JDream III PubMed CENTRAL UMIN-CTR	4	N	N	Y	Y	Y	Y	NA	C	C	6
36	Y	N	Ichushi-Web JDream III PubMed Web of Sciene	4	N	N	Y	Y	Y	Y	NA	N	C	5
37	Y	N	Ichushi-Web JDream III PubMed CENTRAL UMIN-CTR	5	N	N	Y	Y	Y	N	NA	N	C	4
38	Y	C	Ichushi-Web JDream III PubMed CENTRAL Web of Sciene	5	Y	N	Y	Y	Y	Y	NA	N	Y	7
39	Y	Y	JDream III PubMed CENTRAL	3	Y	N	Y	Y	Y	C	NA	C	C	6
40	Y	N	JDream III PubMed CENTRAL	3	N	N	Y	Y	Y	C	NA	N	C	4
41	Y	C	Ichushi-Web PubMed CENTRAL EMBASE Ohost	5	N	N	Y	Y	Y	C	NA	N	C	4
42	Y	N	Ichushi-Web PubMed	2	C	N	Y	Y	Y	C	NA	N	Y	5
43	Y	Y	Ichushi-Web JDream III PubMed CENTRAL UMIN-CTR	5	N	C	Y	Y	Y	C	NA	N	C	5
44	Y	Y	Ichushi-Web PubMed CENTRAL	3	C	N	Y	Y	Y	N	NA	N	Y	6
45	Y	C	Ichushi-Web JDream III PubMed	3	Y	N	Y	Y	Y	C	NA	N	C	5
46	Y	N	JDream III PubMed CENTRAL J-Stage	4	N	N	Y	Y	Y	C	Y	Y	Y	7
47	Y	N	JDream III PubMed CENTRAL	3	N	N	Y	Y	Y	Y	NA	N	C	5
48	Y	C	Ichushi-Web PubMed	2	N	N	Y	Y	Y	C	NA	N	C	4
49	Y	N	Ichushi-Web PubMed CENTRAL JMEDPlus JSTplus JST7580	6	Y	N	Y	Y	Y	C	NA	N	Y	6
50	C	C	Ichushi-Web PubMed CENTRAL	3	Y	N	Y	Y	Y	C	NA	N	N	4
51	N	Y	Ichushi-Web JDream III PubMed	3	N	N	Y	Y	Y	N	NA	N	C	4
52	Y	N	Ichushi-Web PubMed CENTRAL	3	N	N	Y	Y	Y	Y	Y	Y	Y	8
53	Y	N	Ichushi-Web PubMed CENTRAL J-Stage	4	Y	N	Y	Y	Y	Y	NA	N	Y	7
54	Y	N	Ichushi-Web PubMed CENTRAL	3	C	N	Y	Y	Y	Y	NA	N	Y	6
55	Y	C	Ichushi-Web PubMed	2	Y	N	Y	Y	Y	C	NA	N	C	5
56	Y	Y	Ichushi-Web PubMed Core Collection	3	Y	N	Y	Y	Y	Y	NA	N	C	7
57	Y	Y	Ichushi-Web PubMed CENTRAL The Cochrane Library EMBASE	5	Y	N	C	Y	Y	Y	NA	N	C	6
58	Y	Y	Ichushi-Web JDream III PubMed	3	N	N	Y	Y	Y	C	NA	N	C	5
59	C	C	Ichushi-Web PubMed CENTRAL Cinii J-Stage Google Scholar Cochrane Databese for Systematic Reviews Clinicaltrials.gov International Clinical Trials Registry Platform (ICTRP)	9	Y	N	Y	Y	Y	Y	NA	N	Y	6
60	Y	Y	JDream III PubMed	2	N	N	Y	Y	Y	Y	NA	N	C	6
61	Y	Y	Ichushi-Web JDream III PubMed CENTRAL The Cochrane Library	5	Y	N	Y	Y	Y	Y	Y	Y	C	9
62	C	C	JDream III PubMed UMIN-CTR	3	Y	N	Y	C	C	C	NA	N	C	2
63	C	C	JDream III PubMed UMIN-CTR	3	Y	N	Y	C	C	C	NA	N	C	2
64	C	C	JDream III PubMed	2	N	N	Y	C	C	C	NA	N	N	1
65	N	C	JDream III PubMed	2	Y	N	Y	Y	C	C	NA	N	C	3
66	Y	Y	PubMed J-GLOBAL	2	Y	N	Y	Y	C	C	NA	N	Y	6
67	Y	Y	Ichushi-Web JDream III PubMed	3	N	N	Y	Y	Y	Y	NA	N	C	6
68	Y	Y	Ichushi-Web JDream III PubMed	3	N	N	Y	Y	Y	Y	NA	N	C	6
69	Y	C	Jdream III PubMed CENTRAL The Cochrane Library	4	N	N	Y	C	Y	C	NA	N	C	3
70	C	C	JDream III PubMed	2	N	C	Y	C	C	C	NA	N	C	1
71	Y	Y	JDream III PubMed CENTRAL UMIN-CTR	4	Y	N	Y	Y	Y	Y	NA	N	C	7
72	Y	C	Ichushi-Web JDream III PubMed	3	Y	N	Y	Y	C	Y	NA	N	C	5
73	Y	C	Ichushi-Web PubMed Cinii CINAHL Complete Scopus	6	Y	N	Y	C	Y	C	NA	N	C	4
74	Y	Y	JDream III PubMed J-Stage	3	Y	N	Y	Y	C	C	NA	N	C	5
75	Y	Y	Ichushi-Web PubMed CENTRAL	3	Y	N	Y	Y	Y	Y	Y	Y	Y	10
76	Y	C	Ichushi-Web PubMed CENTRAL The Cochrane Library	4	Y	N	Y	Y	Y	Y	NA	N	C	6
77	Y	Y	JDream III PubMed CENTRAL UMIN-CTR	4	Y	N	Y	Y	C	C	NA	N	C	5
78	Y	Y	Ichushi-Web J-Dream III PubMed	3	Y	C	Y	Y	C	Y	NA	N	C	6
79	Y	Y	JDream III PubMed CENTRAL Google scholar UMIN-CTR	5	Y	N	Y	Y	C	C	NA	N	C	5
80	Y	C	Ichushi-Web PubMed CENTRAL The Cochrane Library	4	Y	N	Y	Y	Y	C	NA	N	C	5
81	Y	Y	Ichushi-Web JDream III PubMed CENTRAL J-Stage	5	Y	N	Y	Y	C	C	NA	N	C	5
82	Y	C	JDream III PubMed	2	Y	N	Y	C	C	C	NA	N	C	3
83	Y	C	JDream III PubMed CENTRAL The Cochrane Library UMIN-CTR	5	Y	N	Y	C	C	C	NA	N	C	3
84	Y	C	JDream III PubMed UMIN-CTR ICTRP	4	Y	N	Y	Y	C	C	NA	N	C	4
85	Y	C	JDream III PubMed CENTRAL UMIN-CTR	4	N	N	Y	Y	C	C	NA	N	C	3
86	Y	Y	Ichushi-Web PubMed CENTRAL The Cochrane Library	4	Y	N	Y	Y	C	C	NA	N	C	5
87	Y	C	Ichushi-Web JDream III PubMed UMIN-CTR	4	Y	N	Y	Y	Y	C	NA	N	C	5
88	C	N	JDream III PubMed	2	N	N	Y	Y	C	C	NA	N	C	2
89	C	C	Ichushi-Web PubMed	2	Y	N	Y	C	C	C	NA	N	C	2
90	Y	C	JDream III PubMed CENTRAL The Cochrane Library	4	N	N	Y	C	C	C	NA	NA	C	2
91	C	Y	PubMed Cinii J-Stage UMIN-CTR	4	N	N	Y	C	C	C	NA	N	C	2
92	Y	C	Ichushi-Web PubMed	2	N	N	Y	C	C	C	NA	N	C	2
93	Y	C	Ichushi-Web PubMed CENTRAL The Cochrane Library J-Stage	5	N	N	Y	Y	C	C	Y	Y	C	5
94	Y	C	Ichushi-Web PubMed CENTRAL UMIN-CTR	4	N	N	Y	Y	C	C	NA	N	C	3
95	Y	Y	Ichushi-Web JDream III PubMed CENTRAL The Cochrane Library UMIN-CTR	6	Y	N	Y	C	C	C	NA	N	C	4
96	C	C	JDream III PubMed	2	Y	N	Y	Y	C	C	NA	N	C	3
97	Y	Y	Ichushi-Web JDream III PubMed CENTRAL	4	Y	N	Y	Y	C	C	NA	N	C	5
98	Y	C	Ichushi-Web JDream III PubMed CENTRAL The Cochrane Library	5	Y	N	Y	Y	C	C	NA	N	C	4
99	Y	C	Ichushi-Web PubMed CENTRAL The Cochrane Library	4	Y	N	Y	Y	C	C	NA	N	C	4
100	Y	Y	JDream III PubMed CENTRAL UMIN-CTR	4	N	N	N	Y	C	C	NA	N	C	3
101	Y	C	Ichushi-Web JDream III PubMed	3	N	N	Y	Y	C	C	NA	N	C	3
102	Y	N	JDream III PubMed CENTRAL Cinii The Cochrane Library	5	Y	N	Y	Y	C	C	NA	N	C	4
103	C	C	JDream III PubMed reaxys J-Stage UMIN-CTR	5	Y	N	Y	Y	C	C	NA	N	C	3
104	Y	C	PubMed J-GLOBAL J-Stage Medical Online	4	N	N	Y	Y	C	C	NA	N	C	3
* The order was random-sorted in order to not be identified.
